# Supplementary material for: Accelerated Spatial Fibrin Growth and Impaired Contraction of Blood Clots in Patients with Rheumatoid Arthritis
Source: Int J Mol Sci. 2020 Dec 11;21(24):9434. doi: 10.3390/ijms21249434 (PMC7764115; doi:10.3390/ijms21249434)
Supplement: Supplementary file 1 [file ijms-21-09434-s001.pdf]

## **SUPPLEMENTARY MATERIAL**

### **Accelerated Spatial Fibrin Growth and Impaired Contraction of Blood Clots in Patients with Rheumatoid Arthritis**

Alina D. Peshkova<sup>1</sup>, Tatiana A. Evdokimova<sup>1</sup>, Timur B. Sibgatullin<sup>2</sup>,  
Fazoil I. Ataullakhanov<sup>3</sup>, Rustem I. Litvinov<sup>1,4</sup>, John W. Weisel<sup>4</sup>

<sup>1</sup>Institute of Fundamental Medicine and Biology and <sup>2</sup>University Hospital, Department of Rheumatology, Kazan Federal University, 420008 Kazan, Russian Federation

<sup>3</sup>Center for Theoretical Problems of Physico-Chemical Pharmacology, Russian Academy of Sciences, 119991 Moscow, Russian Federation

<sup>4</sup>Department of Cell and Developmental Biology, University of Pennsylvania Perelman School of Medicine, 19104 Philadelphia, PA, USA

## Supplementary Figure

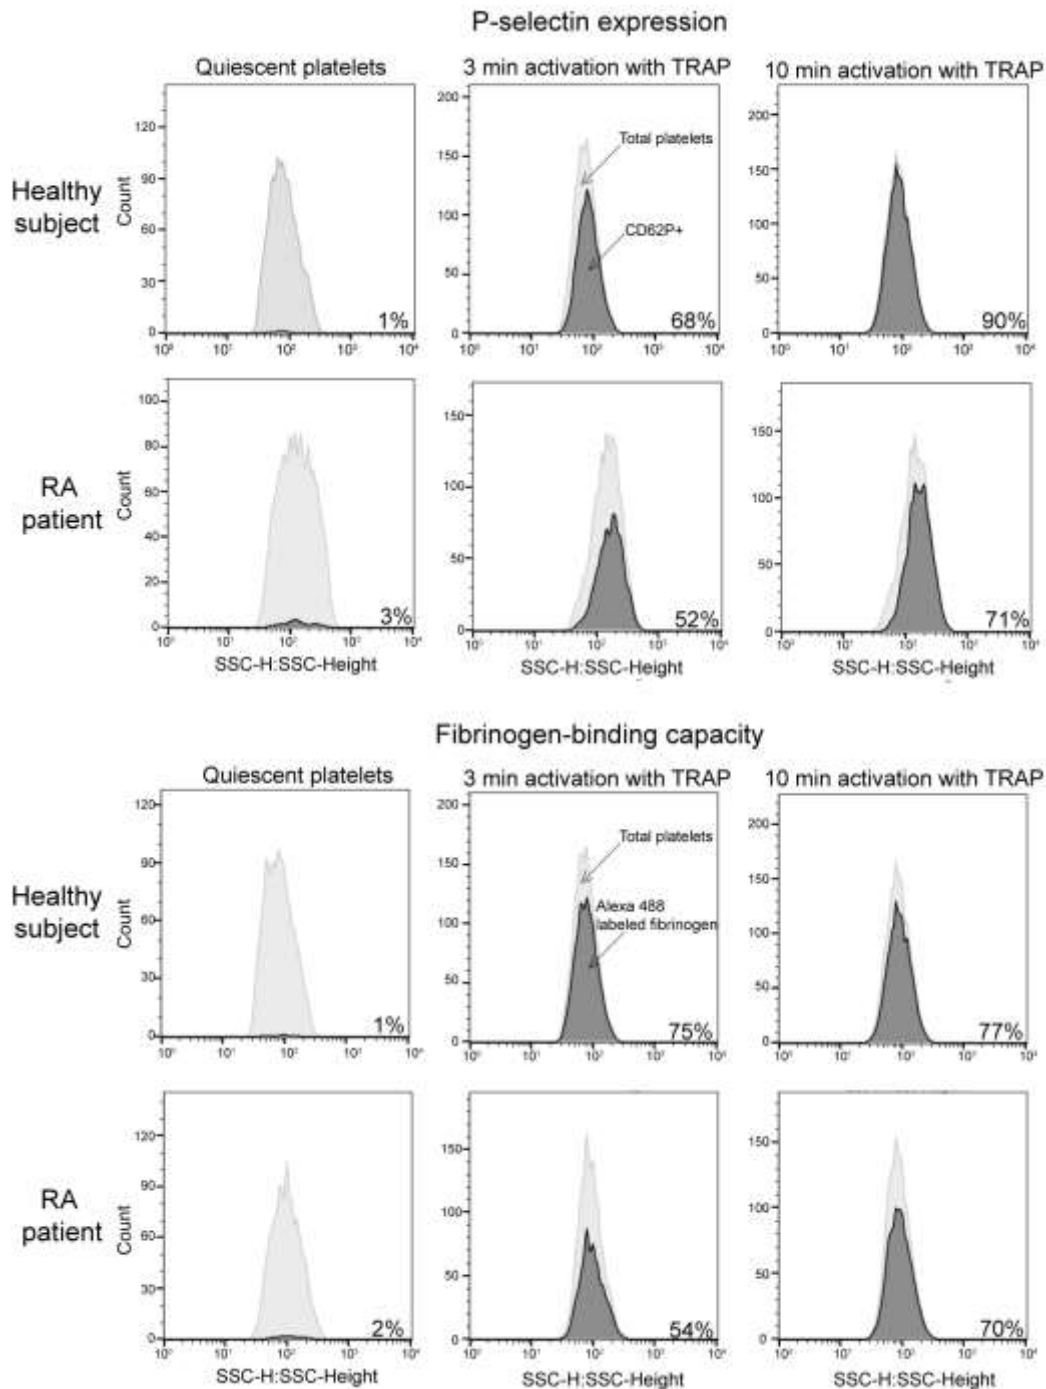

**Figure S1.** Representative raw data from flow cytometry of platelets isolated from the blood of a healthy donor and an RA patient under various experimental conditions. The platelets were incubated for 3 or 10 minutes with either anti-human CD62 phycoerythrin-labeled antibodies or Alexa fluor 488-labeled human fibrinogen before and after activation with thrombin receptor-activating peptide (TRAP). Each plot represents the peak of counts for fluorescent platelets (dark grey) superimposed on the peak of total platelet counts (5,000 total counts each). Numbers (%) in the lower right corner represent the fraction of fluorescent platelets.

## Supplementary Tables

**Table S1.** Parameters of the Thrombodynamics assay in RA patients compared with the control group of healthy subjects

| <i>Parameters</i>                                        | <i>RA patients<br/>(n=60)</i> | <i>Control group<br/>(n=50)</i> |
|----------------------------------------------------------|-------------------------------|---------------------------------|
| Lag-time, min                                            | 0.9 (0.8; 1)                  | 0.9 (0.8; 1)                    |
| Initial rate of clot growth, $\mu\text{m}/\text{min}$    | 53.5 (49.8; 57.2)**           | 50.1 (47.2; 51.2)               |
| Stationary rate of clot growth, $\mu\text{m}/\text{min}$ | 34.3 (29.6; 38.8)***          | 28.5 (26.1; 30.5)               |
| Clot size, $\mu\text{m}$                                 | 1262 (1159;1376)***           | 1128 (1046; 1179)               |
| Clot optical density, a.u.                               | 25398 (22934; 27690)*         | 21662 (19935; 25784)            |

Results are presented as a median and interquartile range (25th and 75th percentiles)

\*p<0.05; \*\*p<0.01; \*\*\*p<0.001 (Mann-Whitney U test)

**Table S2.** Correlation analysis of the parameters of Thrombodynamics assay and blood clot contraction between each other and other laboratory parameters (Spearman's coefficient)

| <i>Correlated parameters</i>                | <i>Parameters of Thrombodynamics assay</i> |                                                               |                                                                     |                         |                                     |                                                           |
|---------------------------------------------|--------------------------------------------|---------------------------------------------------------------|---------------------------------------------------------------------|-------------------------|-------------------------------------|-----------------------------------------------------------|
|                                             | <i>Lag time</i>                            | <i>Initial rate of<br/>clot growth<br/>(<math>V_i</math>)</i> | <i>Stationary<br/>rate of clot<br/>growth (<math>V_{st}</math>)</i> | <i>Clot size</i>        | <i>Clot optical<br/>density (D)</i> | <i>Time to<br/>formation of<br/>spontaneous<br/>clots</i> |
| Initial rate of clot growth ( $V_i$ )       | -0.214                                     | -                                                             | <b>0.587***</b>                                                     | <b>0.776***</b>         | 0.081                               | 0.399                                                     |
| Stationary rate of clot growth ( $V_{st}$ ) | -0.125                                     | <b>0.587***</b>                                               | -                                                                   | <b>0.947***</b>         | 0.024                               | -0.136                                                    |
| Clot size                                   | -0.169                                     | <b>0.776***</b>                                               | <b>0.947***</b>                                                     | -                       | 0.073                               | 0.013                                                     |
| Fibrinogen level                            | 0.177                                      | -0.030                                                        | <b>-0.236*</b>                                                      | -0.175                  | <b>0.535***</b>                     | 0.376                                                     |
| Extent of clot contraction                  | -0.067                                     | <b>0.233*</b>                                                 | <b>0.246*</b>                                                       | 0.210                   | 0.016                               | -0.090                                                    |
| aPPT                                        | 0.168                                      | <b>-0.384**</b>                                               | -0.271                                                              | -0.272                  | 0.225                               | 0.078                                                     |
| Erythrocyte sedimentation rate              | 0.205                                      | -0.051                                                        | <b>-0.218*</b>                                                      | -0.218                  | <b>0.321*</b>                       | 0.262                                                     |
| Anti-DNA antibody level                     | <b>0.435**</b>                             | -0.039                                                        | -0.218                                                              | -0.125                  | 0.103                               | 0.162                                                     |
| Anti-cardiolipin antibody level             | 0.220                                      | <b>-0.327*</b>                                                | -0.273                                                              | -0.273                  | 0.219                               | -0.542                                                    |
| Monocyte count                              | 0.006                                      | -0.063                                                        | -0.015                                                              | 0.007                   | 0.074                               | <b>-0.654**</b>                                           |
| <i>Correlated parameters</i>                | <i>Parameters of clot contraction</i>      |                                                               |                                                                     |                         |                                     |                                                           |
|                                             | <i>Extent of clot<br/>contraction</i>      | <i>Lag time</i>                                               | <i>Area under the curve</i>                                         | <i>Average velocity</i> |                                     |                                                           |
| Extent of clot contraction                  | -                                          | <b>-0.484***</b>                                              | <b>0.843***</b>                                                     | <b>0.922***</b>         |                                     |                                                           |
| Lag time of clot contraction                | <b>-0.484***</b>                           | -                                                             | <b>-0.645***</b>                                                    | <b>-0.482***</b>        |                                     |                                                           |
| Area under the kinetic curve                | <b>0.834***</b>                            | <b>-0.645***</b>                                              | -                                                                   | <b>0.902***</b>         |                                     |                                                           |
| Average velocity of contraction             | <b>0.922***</b>                            | <b>-0.482***</b>                                              | <b>0.902***</b>                                                     | -                       |                                     |                                                           |
| Platelet count                              | <b>0.321*</b>                              | -0.113                                                        | <b>0.320*</b>                                                       | <b>0.369*</b>           |                                     |                                                           |
| RBC count                                   | <b>-0.295*</b>                             | -0.074                                                        | -0.163                                                              | -0.182                  |                                     |                                                           |
| Hemoglobin                                  | <b>-0.255*</b>                             | 0.067                                                         | -0.173                                                              | -0.157                  |                                     |                                                           |

\*p<0.05; \*\*p<0.01; \*\*\*p<0.01

**Table S3.** Parameters of blood clot contraction in RA patients compared with the control group of healthy subjects

| <i>Parameters</i>             | <i>RA patients (n=60)</i> | <i>Control group (n=50)</i> |
|-------------------------------|---------------------------|-----------------------------|
| Extent of clot contraction, % | 37 (31; 41)***            | 49 (45; 53)                 |
| Lag time, sec.                | 255 (180; 293)***         | 105 (45; 150)               |
| Average velocity, %/sec       | 0.029 (0.023; 0.034)***   | 0.039 (0.036; 0.042)        |
| Area under the curve, a.u.    | 249 (175; 307)***         | 395 (355; 432)              |

Results are presented as a median and interquartile range (25th and 75th percentiles).

\*\*\*p <0.001 (Mann-Whitney U test)

**Table S4.** Phase kinetic parameters of clot contraction in clots made from the blood of RA patients and control healthy subjects

| <i>Rate constants</i> | <i>RA patients (n=60)</i>   | <i>Control group (n=50)</i> |
|-----------------------|-----------------------------|-----------------------------|
| Phase 1, 1/s          | 0.0001 (0.0001; 0.0379)     | 0.0166 (0.0001;0.0325)      |
| Phase 2, %/s          | 0.035 (0.0158; 0.0544)***** | 0.057 (0.0407; 0.0787)      |
| Phase 3, 1/s          | 0.002 (0.0002; 0.0035)      | 0.002 (0.00142; 0.00316)    |

Results are presented as a median and interquartile range (25th and 75th percentiles).

\*\*\*p<0.0001 between the values for phase 2

**Table S5.** Parameters of blood clot contraction in RA patients, taking and not taking non-steroidal anti-inflammatory drugs (NSAIDs)

| <i>Parameters</i>             | <i>Patients taking NSAIDs (n=42)</i> | <i>Patients not taking NSAIDs (n=18)</i> |
|-------------------------------|--------------------------------------|------------------------------------------|
| Extent of clot contraction, % | 37 (31; 43)                          | 36 (30; 41)                              |
| Lag time, sec.                | 218 (180; 278)                       | 240 (191; 315)                           |
| Average velocity, %/sec.      | 0.031 (0.025; 0.035)                 | 0.029 (0.021; 0.032)                     |
| Area under the curve, a.u.    | 257 (189; 318)                       | 255 (147; 305)                           |

Results are presented as a median and interquartile range (25th and 75th percentiles) (Mann-Whitney U test)
